# Supplementary material for: Local Human Impacts Disrupt Relationships Between Benthic Reef Assemblages and Environmental Predictors
Source: Frontiers journal article supplement (doi:10.3389/fmars.2020.571115), 2020-10-21
Supplement: Table_2.DOCX [file Table_2.DOCX]

**Supplementary Table 2** - Herbivorous fish recorded within surveys, classified into functional groups as specified in Heenan et al. (2016).

| **Functional group** | **Species** |
| --- | --- |
| Browsers | *Calotomus carolinus* |
| Browsers | *Calotomus spinidens* |
| Browsers | *Kyphosus cinerascens* |
| Browsers | *Kyphosus* sp*.* |
| Browsers | *Kyphosus vaigiensis* |
| Browsers | *Leptoscarus vaigiensis* |
| Browsers | *Naso annulatus1* |
| Browsers | *Naso brachycentron* |
| Browsers | *Naso brevirostris1* |
| Browsers | *Naso lituratus* |
| Browsers | *Naso* sp. |
| Browsers | *Naso tuberosus* |
| Browsers | *Naso unicornis* |
| Browsers | *Platax orbicularis* |
| Browsers | *Platax* sp*.* |
| Browsers | *Platax teira* |
| Browsers | *Siganus canaliculatus* |
| Detritivores | *Ctenochaetus binotatus* |
| Detritivores | *Ctenochaetus cyanocheilus* |
| Detritivores | *Ctenochaetus flavicauda* |
| Detritivores | *Ctenochaetus hawaiiensis* |
| Detritivores | *Ctenochaetus marginatus* |
| Detritivores | *Ctenochaetus* sp. |
| Detritivores | *Ctenochaetus striatus* |
| Detritivores | *Ctenochaetus strigosus* |
| Detritivores | *Ctenochaetus tominiensis* |
| Grazers | *Acanthurus achilles* |
| Grazers | *Acanthurus auranticavus* |
| Grazers | *Acanthurus blochii* |
| Grazers | *Acanthurus dussumieri* |
| Grazers | *Acanthurus fowleri* |
| Grazers | *Acanthurus guttatus* |
| Grazers | *Acanthurus leucocheilus* |
| Grazers | *Acanthurus leucopareius* |
| Grazers | *Acanthurus lineatus* |
| Grazers | *Acanthurus maculiceps* |
| Grazers | *Acanthurus nigricans* |
| Grazers | *Acanthurus nigricauda* |
| Grazers | *Acanthurus nigrofuscus* |
| Grazers | *Acanthurus nigroris* |
| Grazers | *Acanthurus olivaceus* |
| Grazers | *Acanthurus pyroferus* |
| Grazers | *Acanthurus* sp. |
| **Functional group** | **Species** |
| Grazers | *Acanthurus triostegus* |
| Grazers | *Acanthurus xanthopterus* |
| Grazers | *Centropyge bicolor* |
| Grazers | *Centropyge bispinosa* |
| Grazers | *Centropyge flavissima* |
| Grazers | *Centropyge loricula* |
| Grazers | *Centropyge* sp. |
| Grazers | *Centropyge tibicen* |
| Grazers | *Centropyge vrolikii* |
| Grazers | *Siganus argenteus* |
| Grazers | *Siganus corallinus* |
| Grazers | *Siganus doliatus* |
| Grazers | *Siganus fuscescens* |
| Grazers | *Siganus guttatus* |
| Grazers | *Siganus lineatus* |
| Grazers | *Siganus niger* |
| Grazers | *Siganus puellus* |
| Grazers | *Siganus punctatissimus* |
| Grazers | *Siganus punctatus* |
| Grazers | *Siganus randalli* |
| Grazers | *Siganus* sp*.* |
| Grazers | *Siganus spinus* |
| Grazers | *Siganus stellatus* |
| Grazers | *Siganus uspi* |
| Grazers | *Siganus vermiculatus* |
| Grazers | *Siganus vulpinus* |
| Grazers | *Zebrasoma flavescens* |
| Grazers | *Zebrasoma rostratum* |
| Grazers | *Zebrasoma scopas* |
| Grazers | *Zebrasoma velifer* |
| Scrapers / small excavators | *Chlorurus bleekeri* |
| Scrapers / small excavators | *Chlorurus bowersi* |
| Scrapers / small excavators | *Chlorurus japanensis* |
| Scrapers / small excavators | *Chlorurus sordidus* |
| Scrapers / small excavators | *Chlorurus* sp. |
| Scrapers / small excavators | *Hipposcarus longiceps* |
| Scrapers / small excavators | *Scarus altipinnis* |
| Scrapers / small excavators | *Scarus chameleon* |
| Scrapers / small excavators | *Scarus dimidiatus* |
| Scrapers / small excavators | *Scarus festivus* |
| Scrapers / small excavators | *Scarus flavipectoralis* |
| Scrapers / small excavators | *Scarus forsteni* |
| Scrapers / small excavators | *Scarus frenatus* |
| Scrapers / small excavators | *Scarus ghobban* |
| Scrapers / small excavators | *Scarus globiceps* |
| Scrapers / small excavators | *Scarus hypselopterus* |
| **Functional group** | **Species** |
| Scrapers / small excavators | *Scarus longipinnis* |
| Scrapers / small excavators | *Scarus niger* |
| Scrapers / small excavators | *Scarus oviceps* |
| Scrapers / small excavators | *Scarus prasiognathos* |
| Scrapers / small excavators | *Scarus psittacus* |
| Scrapers / small excavators | *Scarus quoyi* |
| Scrapers / small excavators | *Scarus rivulatus* |
| Scrapers / small excavators | *Scarus schlegeli* |
| Scrapers / small excavators | *Scarus* sp. |
| Scrapers / small excavators | *Scarus spinus* |
| Scrapers / small excavators | *Scarus tricolor* |
| Scrapers / small excavators | *Scarus xanthopleura* |
| Large excavators / bioeroders | *Bolbometopon muricatum* |
| Large excavators / bioeroders | *Cetoscarus ocellatus2* |
| Large excavators / bioeroders | *Chlorurus frontalis2* |
| Large excavators / bioeroders | *Chlorurus microrhinos2* |
| Large excavators / bioeroders | *Scarus rubroviolaceus2* |

*1 classified as ‘browser’ until reaches 20 cm in length*

*2 classified as ‘scraper/small excavator’ when smaller than 35 cm in length, and ‘large excavator/bioeroder’ when larger than 35 cm in length*

**Reference**

Heenan A, Hoey AS, Williams GJ, Williams ID (2016) Natural bounds of herbivorous coral reef fishes. *Proc. R. Soc. B* **283**: 20161716. http://dx.doi.org/10.1098/rspb.2016.1716
